# Supplementary material for: Phase Morphology, Mechanical, and Thermal Properties of Calcium Carbonate-Reinforced Poly(L-lactide)-b-poly(ethylene glycol)-b-poly(L-lactide) Bioplastics
Source: MDPI journal article supplement (doi:10.3390/polym15020301), 2023-01-06
Supplement: s1 [file s1]

# Phase Morphology, Mechanical, and Thermal Properties of Calcium Carbonate-Reinforced Poly(L-lactide)-*b*-poly(ethylene glycol)-*b*-poly(L-lactide) Bioplastics

Prasong Srihanam, Wiriya Thongsomboon and Yodthong Baimark \*

Biodegradable Polymers Research Unit, Department of Chemistry and Centre of Excellence for Innovation in Chemistry, Faculty of Science, Mahasarakham University, Mahasarakham 44150, Thailand

\* Correspondence: yodthong.b@msu.ac.th

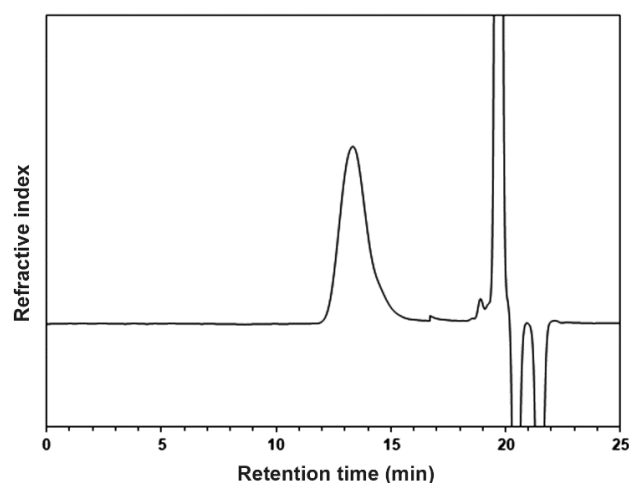

Figure S1. GPC curve of a chain-extended PLLA-*b*-PEG-*b*-PLLA.

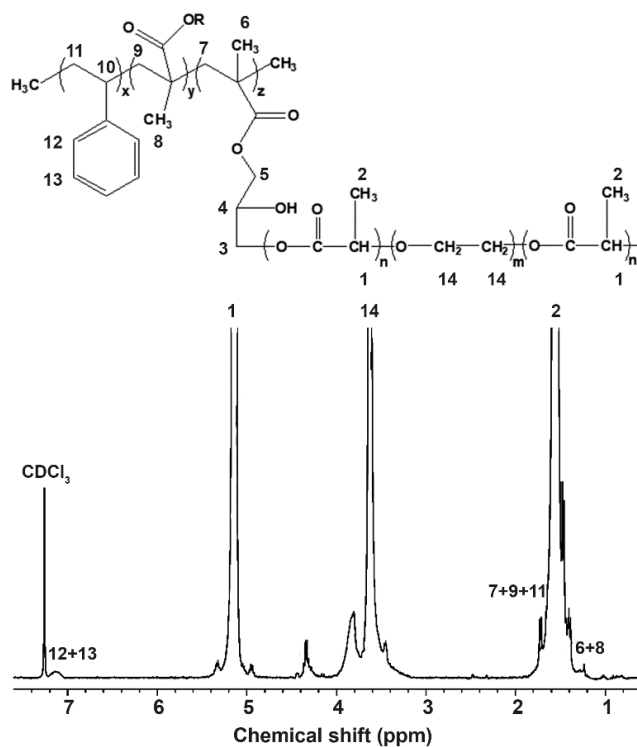

Figure S2. <sup>1</sup>H-NMR spectrum of a chain-extended PLLA-*b*-PEG-*b*-PLLA.

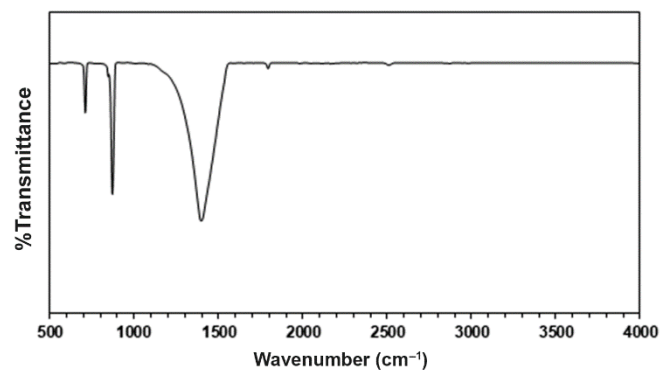

**Figure S3.** FTIR spectrum of CaCO<sub>3</sub> powder.

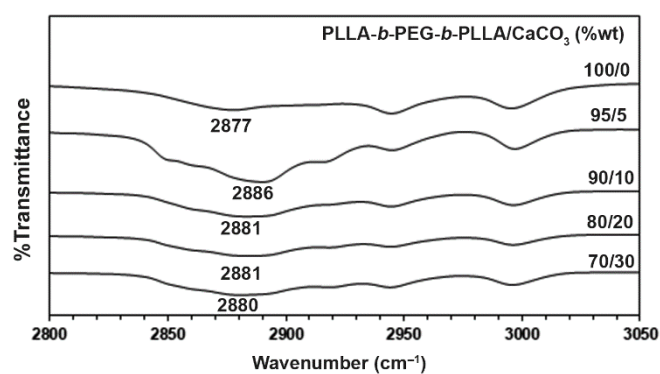

**Figure S4.** Expanded ATR-FTIR spectra of PLLA-*b*-PEG-*b*-PLLA/CaCO<sub>3</sub> composite films with various CaCO<sub>3</sub> ratios.

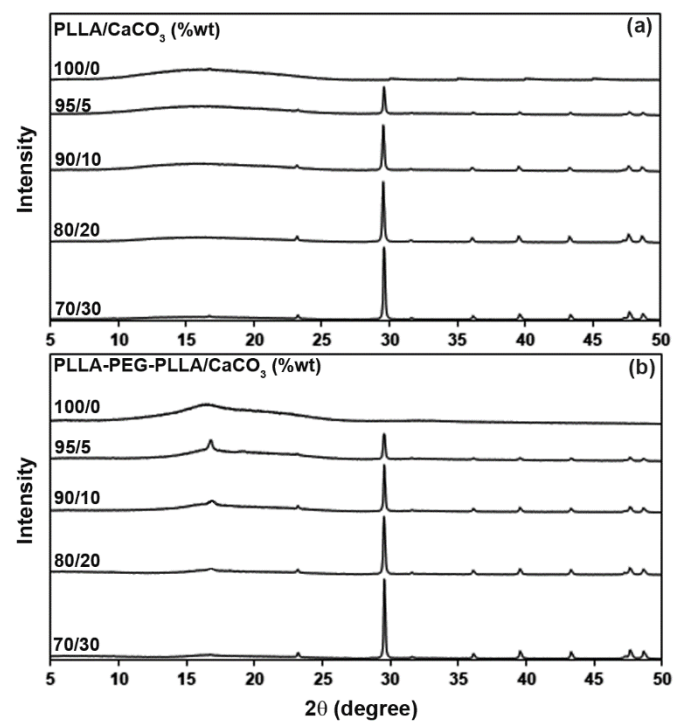

**Figure S5.** XRD patterns of (a) PLLA/CaCO<sub>3</sub> and (b) PLLA-*b*-PEG-*b*-PLLA/CaCO<sub>3</sub> films with various CaCO<sub>3</sub> ratios.
